# Supplementary material
Source: PubMed Central journal article supplement (PMC3997647)
Supplement: supp_mcu031_mcu031supp.pdf [file supp_mcu031_mcu031supp.pdf]

## SUPPLEMENTARY DATA

Principal floral visitors of *T. macropetala* recorded with video cameras and by direct observation.

| Period of activity | Species                                                            | Relative frequency (N) % | Visit reward / objective | Visitor category |
|--------------------|--------------------------------------------------------------------|--------------------------|--------------------------|------------------|
| Nocturnal          | <i>Anoura geoffroyi</i><br>(Chiroptera:<br>Phyllostomidae)         | (158) 75.24              | Nectar                   | Pollinator       |
| Nocturnal          | <i>Peromyscus</i> sp.<br>(Rodentia:<br>Cricetidae)                 | (10) 4.76                | Pollen                   | Pollen thief     |
| Nocturnal          | Noctuidae sp.1<br>(Lepidoptera)                                    | (2) 0.95                 | -                        | -                |
| Diurnal            | <i>Lampornis<br/>amethystinus</i><br>(Apodiformes:<br>Trochilidae) | (32) 15.24               | Nectar                   | Nectar thief     |
| Diurnal            | <i>Dismorphia</i> sp.<br>(Lepidoptera:<br>Pieridae)                | (2) 0.95                 | Nectar                   | Nectar thief     |
| Diurnal            | <i>Bombus</i> sp.1<br>(Hymenoptera:<br>Apidae)                     | (2) 0.95                 | Nectar                   | Pollen thief     |
| Diurnal            | <i>Apis mellifera</i><br>(Hymenoptera:<br>Apidae)                  | (2) 0.95                 | -                        | -                |
| Diurnal            | Vespidae sp.1<br>(Hymenoptera)                                     | (1) 0.48                 | Nectar                   | Nectar thief     |
| Diurnal            | Blattidae sp.1<br>(Blattodea)                                      | (1) 0.48                 | Nectar                   | Nectar thief     |
